# Supplementary material for: Economic Potential for Distributed Manufacturing of Adaptive Aids for Arthritis Patients in the U.S
Source: Geriatrics (Basel). 2018 Dec 6;3(4):89. doi: 10.3390/geriatrics3040089 (PMC6371113; doi:10.3390/geriatrics3040089)
Supplement: Supplementary file 1 [file geriatrics-03-00089-s001.xlsx]

## Sheet: Sheet1
Table S1	Spreadsheet of equivalent commercial adaptive aids
Adaptive Aid	URL source of cost estimate
Scissor aid	1. https://www.arthritissupplies.com/mounted-table-top-scissors.html (28 October 2018)
Car seat aid	2. https://www.amazon.com/stores/node/17524481011?_encoding=UTF8&field-lbr_brands_browse-bin=UnbuckleMe&ref_=bl_dp_s_web_17524481011 (28 October 2018)
Can opener aid	3. https://www.amazon.com/Norpro-NOR-450D-Piece-Grip-Ez-Opener/dp/B000SSVD50/ref=asc_df_B000SSVD50/?tag=hyprod-20&linkCode=df0&hvadid=229276028600&hvpos=1o5&hvnetw=g&hvrand=16402048169793656848&hvpone=&hvptwo=&hvqmt=&hvdev=c&hvdvcmdl=&hvlocint=&hvlocphy=9017742&hvtargid=pla-390706829662&psc=1 (28 October 2018).
Light switch aid	4. https://www.amazon.com/KidSwitch-Award-Winning-Extender-Children-Toddlers/dp/B001GHZ2L8/ref=asc_df_B001GHZ2L8/?tag=hyprod-20&linkCode=df0&hvadid=198091458661&hvpos=1o20&hvnetw=g&hvrand=13483612557074496901&hvpone=&hvptwo=&hvqmt=&hvdev=c&hvdvcmdl=&hvlocint=&hvlocphy=9017742&hvtargid=pla-389406858123&psc=1 (28 October 2018)
Sock aid	5. https://www.arthritissupplies.com/easy-on-off-sock-aid-kit.html (28 October 2018)
Knife guide aid	6. https://www.arthritissupplies.com/easi-grip-contoured-handle-carving-knife.html?gclid=EAIaIQobChMI_6Pq_e6p3gIViURpCh1iKA7lEAkYAyABEgKRwfD_BwE (28 October 2018)
Phone holder aid	7. https://www.supportplus.com/cgi-bin/hazel.cgi?ACTION=DETAIL&ITEM=FH2152&websource=SPGOOGLE7&source_code=SPGOOGLE7&utm_source=google&utm_medium=cpc&gclid=EAIaIQobChMI_rr2re-p3gIVBxxpCh2UoACkEAkYCyABEgJ4IvD_BwE (28 October 2018)
Zipper pull aid	8. https://www.alimed.com/ableware-button-aid-zipper-pull.html (28 October 2018)
Knitting aid	9. https://www.etsy.com/listing/493586857/as-seen-in-knitting-magazines-knitting?gpla=1&gao=1&&utm_source=google&utm_medium=cpc&utm_campaign=shopping_us_a-craft_supplies_and_tools-tools_and_equipment-tools-other&utm_custom1=7793019d-1068-43d9-abf6-46225aea5e3b&utm_content=go_270947675_41952119976_190744325429_pla-295604191622_c__493586857&gclid=EAIaIQobChMI4uC37--p3gIVgRhpCh3IiwBCEAkYFSABEgIcbPD_…
Pen holder aid	10. https://www.wrightstuff.biz/product.asp?itemid=3884&utm_source=googleshopping&utm_medium=cse&gclid=EAIaIQobChMIkcu0mPCp3gIVTtbACh0ejQ2tEAQYAyABEgJt8fD_BwE (28 October 2018)
Nail clipper aid	11. https://www.arthritissupplies.com/arthritis-table-top-nail-clipper.html?gclid=EAIaIQobChMIiL_au_Cp3gIVCr7ACh3PcAOeEAQYAyABEgLJCfD_BwE (28 October 2018)
Cane holder aid	12. https://www.arthritissupplies.com/ingrid-cane-holder-walking-cane-or-crutch-holder.html (28 October 2018)
Key aid	13. https://www.performancehealth.com/ez-key-turner-pkg-2?gclid=EAIaIQobChMI_MyB6PCp3gIVU7jACh0hqAZIEAQYASABEgJ-7vD_BwE (28 October 2018)
Typing aid	14. https://www.maxiaids.com/page-turner-keyboard-aid-with-wrist-cuff (28 October 2018)
Pop can aid	15. https://www.maxiaids.com/can-opener-for-ring-pull-cans (28 October 2018)
Dog leash aid	16. https://www.leashboss.com/products/leashboss-traffic-handler-18-inch-heavy-duty-short-dog-leash-for-large-dogs?variant=12577623236&utm_source=google&utm_medium=cpc&utm_campaign=175241389&utm_content=10581226189&gclid=EAIaIQobChMI3qnA6_Gp3gIVEIZpCh0rmQzOEAkYAyABEgIti_D_BwE (28 October 2018)
Gas cap aid	17. https://www.arthritissupplies.com/gas-cap-wrench.html (28 October 2018)
Handle adapter aid	18. https://www.amazon.com/Easi-Grip-Add-On-Handles/dp/B002WSSOOC?SubscriptionId=AKIAIKBZ7IH7LXTW3ARA&&linkCode=xm2&camp=2025&creative=165953&creativeASIN=B002WSSOOC&tag=wwwbookcompar-20&ascsubtag=5bd1d196eba0c90278662bf5 (28 October 2018)
Toothbrush aid	19. https://www.amazon.com/Ableware-Universal-Built-Up-Handle-Pack/dp/B00BSF7YC8/ref=asc_df_B00BSF7YC8/?tag=hyprod-20&linkCode=df0&hvadid=167119246510&hvpos=1o2&hvnetw=g&hvrand=11973220818841827614&hvpone=&hvptwo=&hvqmt=&hvdev=c&hvdvcmdl=&hvlocint=&hvlocphy=9017742&hvtargid=pla-313307243166&psc=1 (28 October 2018)
Pill splitter aid	20. https://www.alimed.com/pill-splitter.html (28 October 2018)
